# Supplementary material
Source: ML conference proceedings conference paper supplement (https://openaccess.thecvf.com/content/WACV2024/html/Shoshan_FPGAN-Control_A_Controllable_WACV_2024_paper.html)
Supplement: Supplementary file 1 [file Shoshan_FPGAN-Control_A_Controllable_WACV_2024_supplemental.pdf]

# FPGAN-Control: A Controllable Fingerprint Generator for Training with Synthetic Data —Supplementary—

## 1. Additional FPGAN-Control generation results

Figures 1, 2, 3, and 4 show additional results for images generated by FPGAN-Control models trained with different values of  $w_{app}$  (0, 1, 5 and 20 respectively). Each column corresponds to images generated with the same ID latent and each row corresponds to images generated with the same appearance latent. As expected, for  $w_{app} = 0$  the image appearance (of each identity) is hardly changing between rows, while as  $w_{app}$  increases, fingerprints with the same identity exhibit larger appearance variety. In addition, the figures demonstrate the improvement in appearance control with the increase of  $w_{app}$ . This is evident when examining Figure 4 ( $w_{app} = 20$ ), where all images in the same row have very similar appearance.

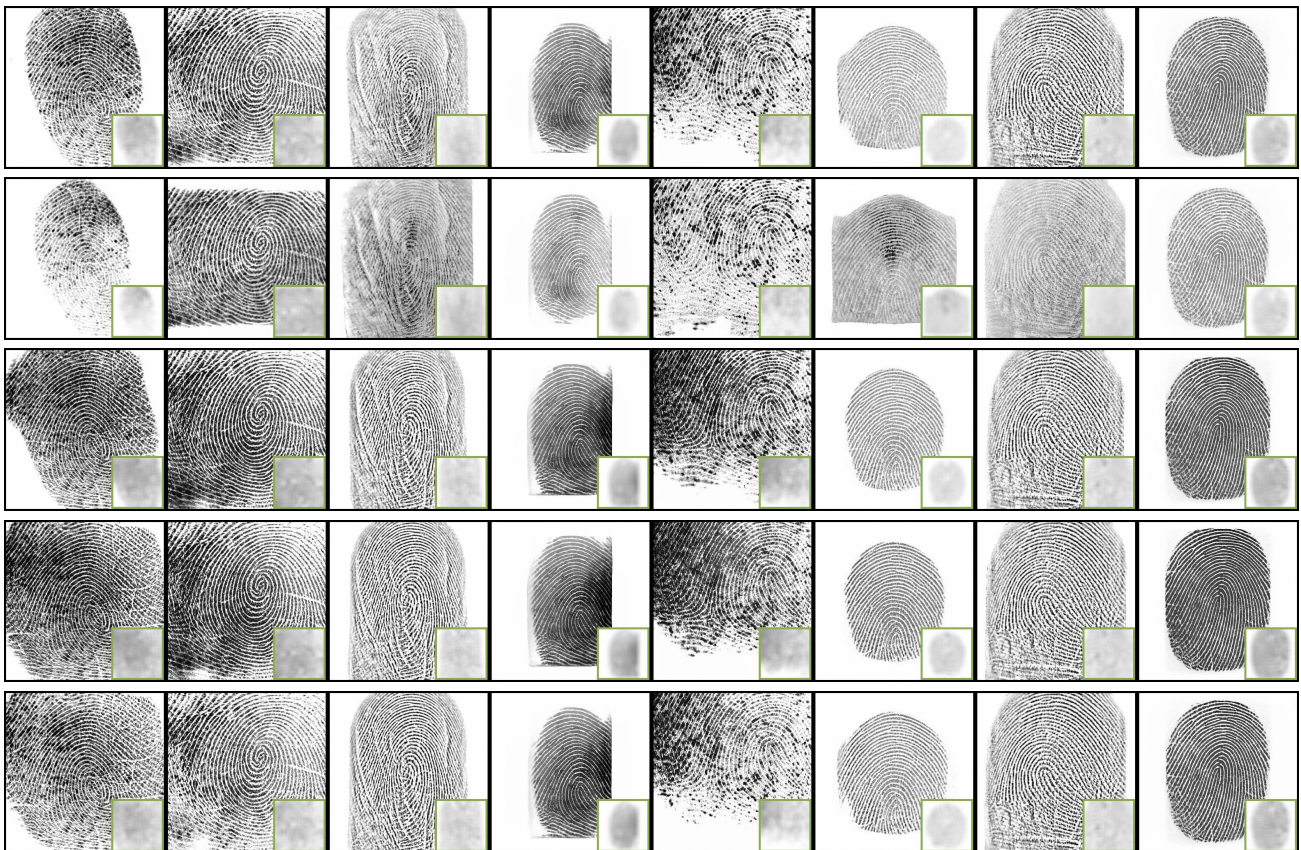

Figure 1. Generation results of FPGAN-Control trained using  $w_{app} = 0$ .

Table 1 shows the FID scores [1] of the FPGAN-Control models used in the paper.



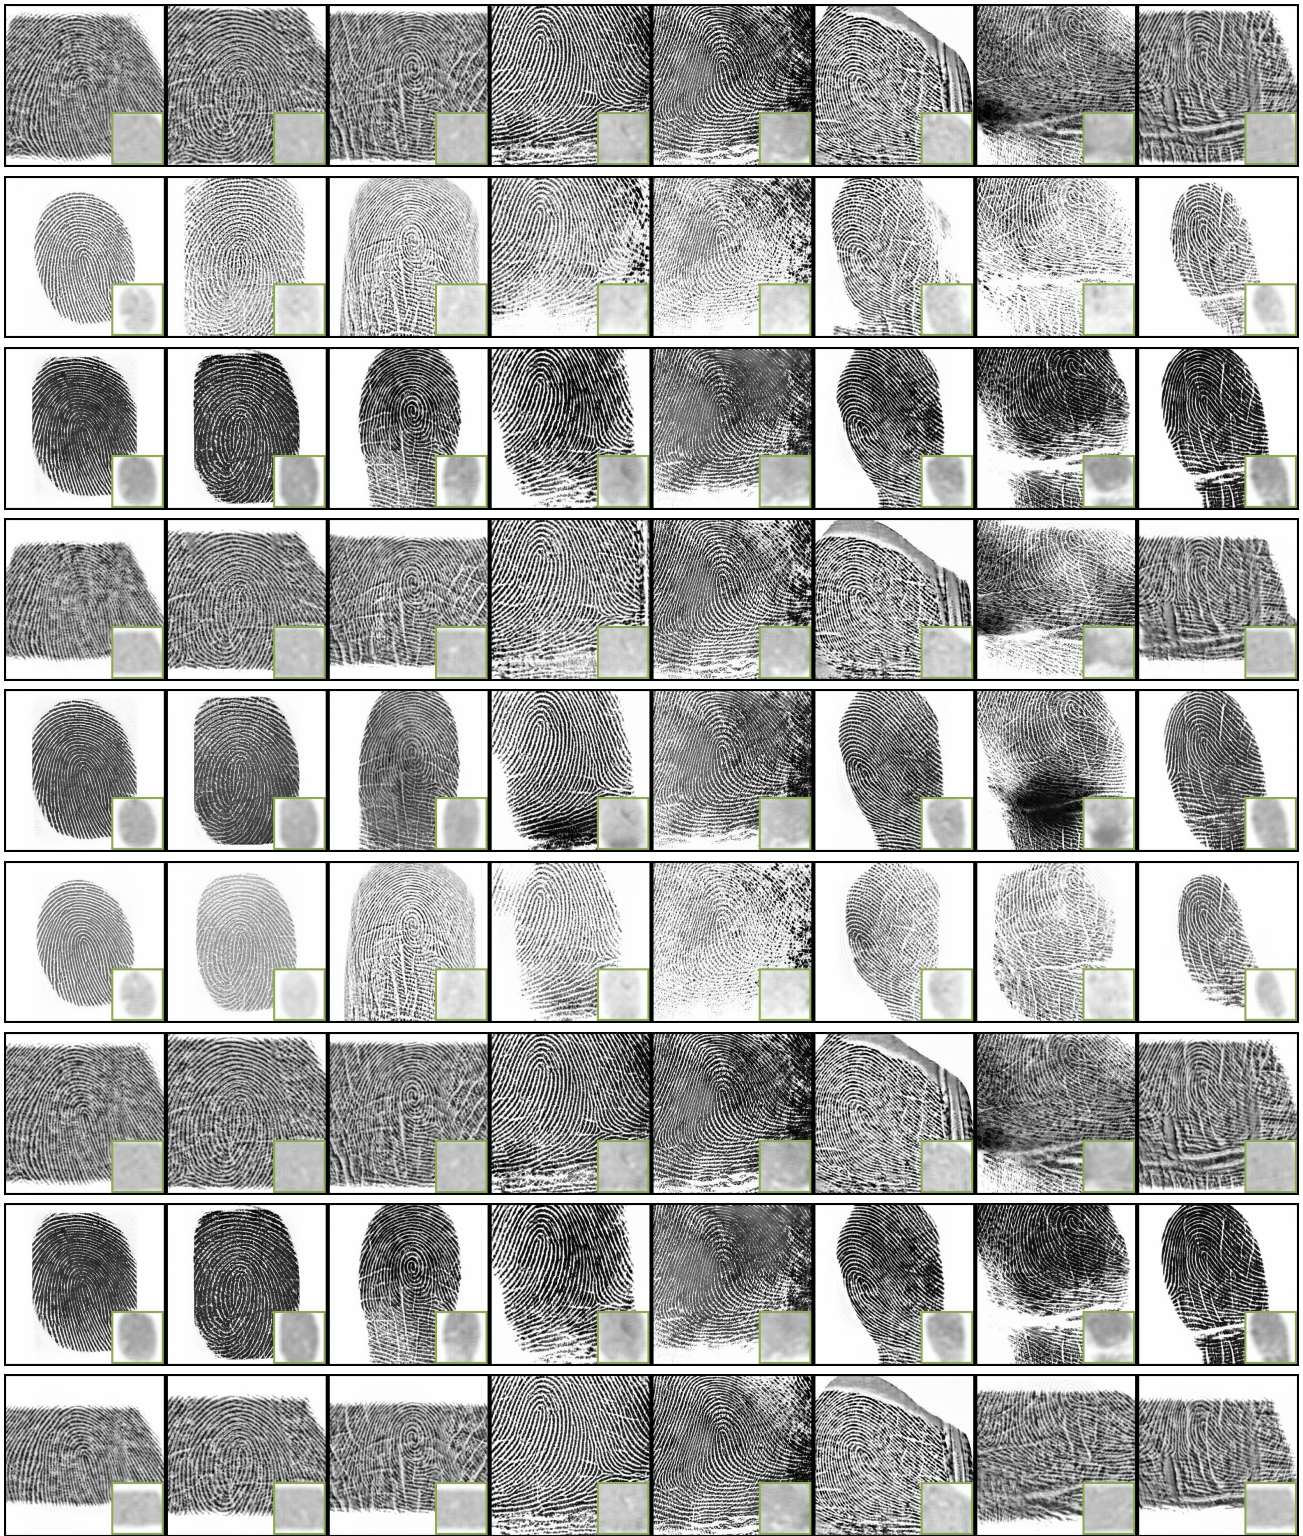

Figure 2. Generation results of FPGAN-Control trained using  $w_{app} = 1$ .



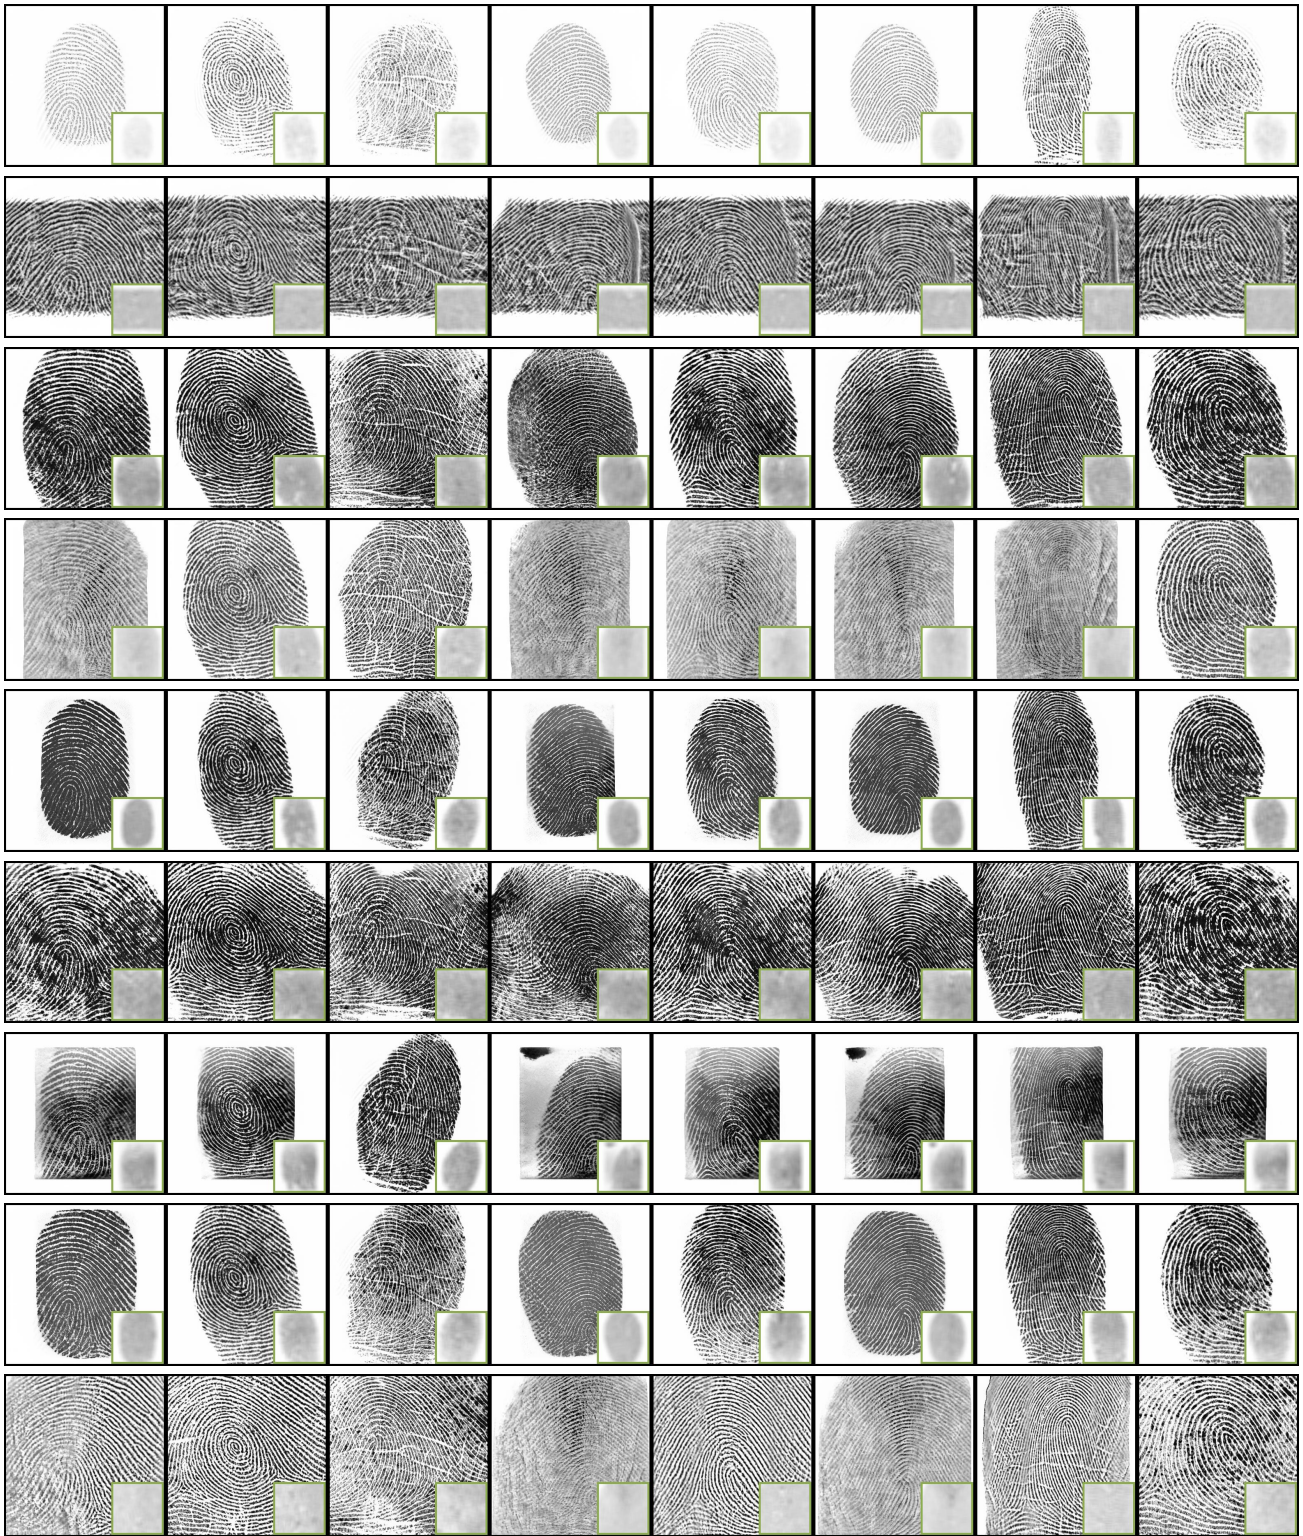

Figure 3. Generation results of FPGAN-Control trained using  $w_{app} = 5$ .



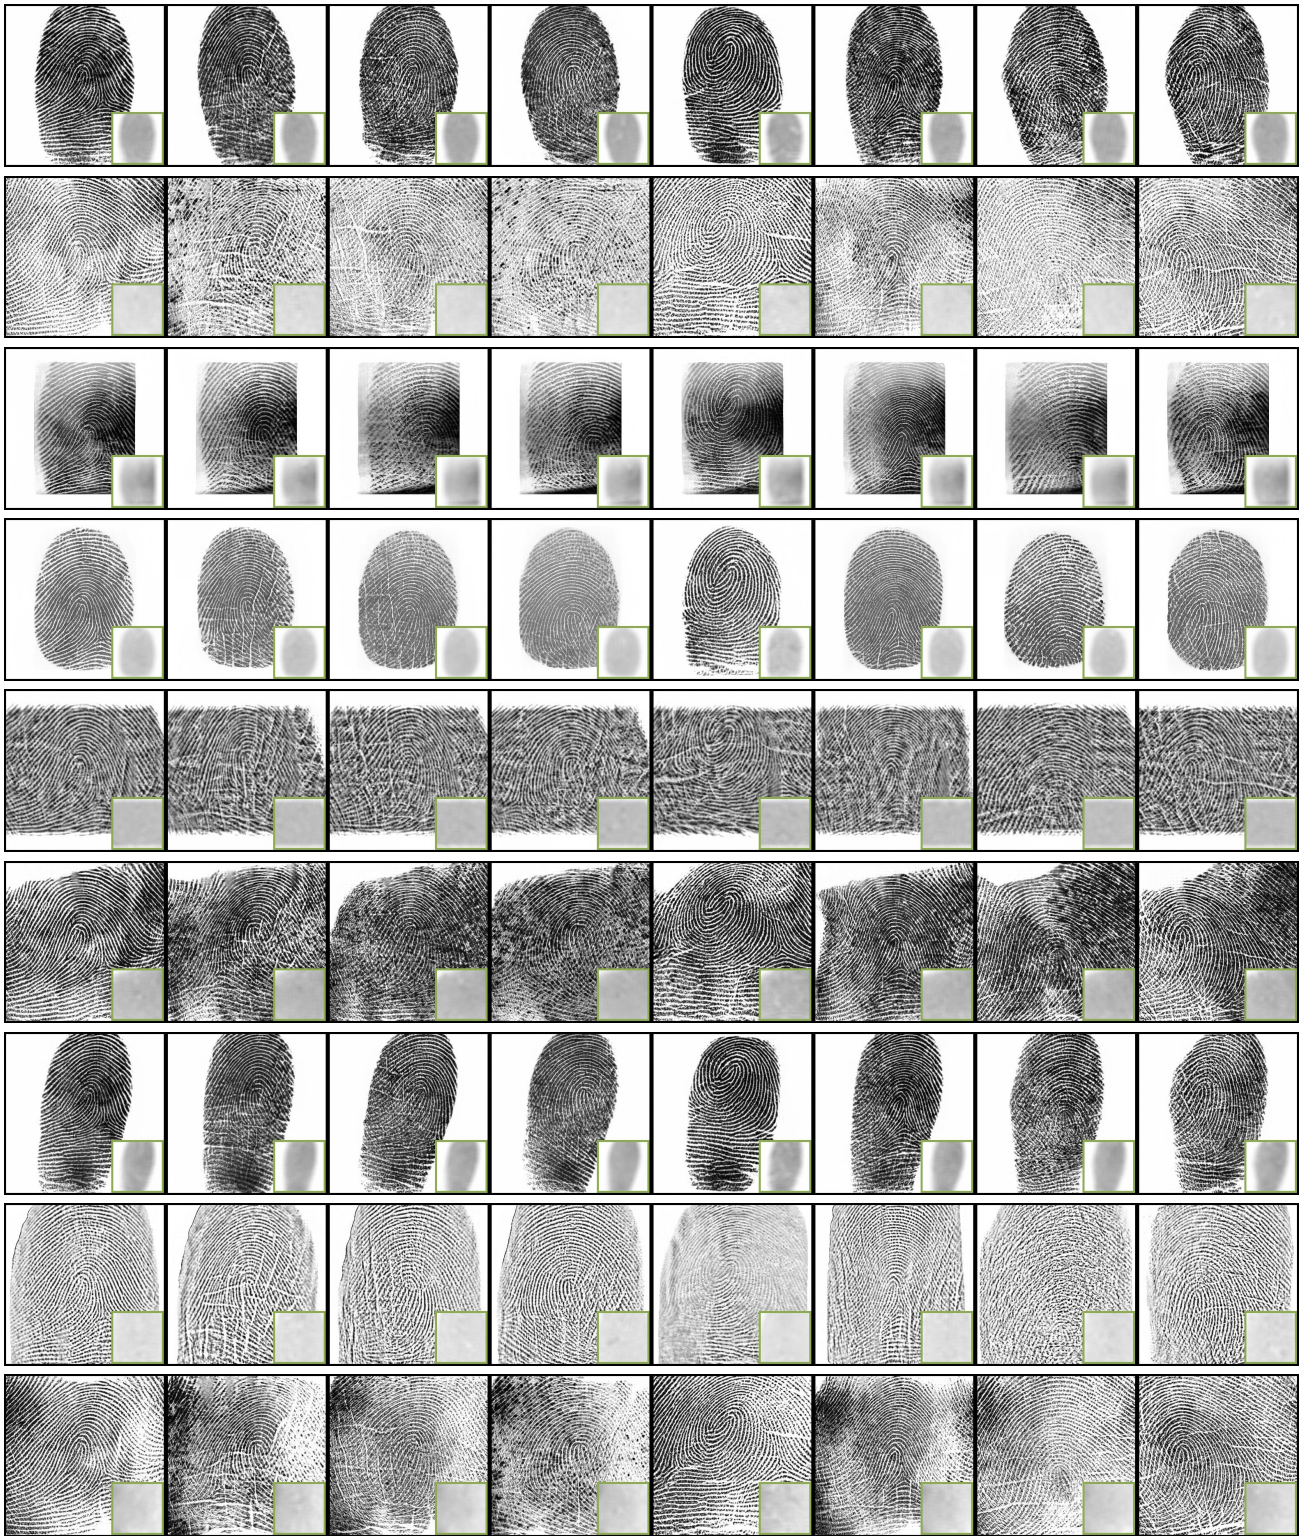

Figure 4. Generation results of FPGAN-Control trained using  $w_{app} = 20$ .



| $w_{app}$ | 0    | 0.25 | 0.5  | 1    | 5    | 20   |
|-----------|------|------|------|------|------|------|
| FID↓      | 4.74 | 4.72 | 5.56 | 4.73 | 5.04 | 5.61 |

Table 1. FID scores of FPGAN-Control models trained with different  $w_{app}$  values.

## 2. Additional training with synthetic data results

| Training dataset    | Res18        | Res34        | Res50        | Res101       | Mob-050      | Mob-100      | Eff-s        |
|---------------------|--------------|--------------|--------------|--------------|--------------|--------------|--------------|
| Real data           | 90.54        | 89.72        | 92.00        | 93.69        | 93.74        | 94.22        | 93.69        |
| StyleGAN2           | 12.57        | 5.46         | 5.86         | 4.07         | 38.16        | 19.36        | 16.18        |
| PrintsGAN           | 61.30        | 56.30        | 62.17        | 67.20        | 69.88        | 76.58        | 68.05        |
| FPGC-0              | 80.23        | 75.17        | 80.39        | 88.57        | 88.55        | 89.75        | 80.01        |
| FPGC-0.25           | 80.42        | 78.27        | 81.48        | 90.29        | 87.68        | 88.78        | 80.39        |
| FPGC-0.5            | 81.37        | 79.14        | 82.88        | 89.38        | 87.46        | 89.52        | 81.83        |
| FPGC-1              | 85.58        | 81.64        | 82.82        | 89.81        | <b>89.25</b> | <b>89.76</b> | 82.95        |
| FPGC-5              | 82.02        | 79.27        | 81.02        | 82.20        | 87.25        | 87.78        | 79.87        |
| FPGC-20             | <b>85.90</b> | <b>84.36</b> | <b>84.38</b> | <b>91.07</b> | 88.57        | 89.28        | <b>87.82</b> |
| FPGC-0.25 + FPGC-20 | 87.20        | 86.10        | <b>88.00</b> | 91.63        | <b>91.19</b> | 92.08        | 89.32        |
| FPGC-0.5 + FPGC-20  | 87.29        | 86.04        | 87.25        | <b>92.81</b> | 91.01        | <b>92.12</b> | 90.13        |
| FPGC-1 + FPGC-20    | 87.65        | <b>87.01</b> | 87.47        | 92.08        | 90.99        | 91.64        | 89.46        |
| FPGC-5 + FPGC-20    | <b>87.77</b> | 86.76        | 86.13        | 91.12        | 90.86        | 91.44        | <b>90.22</b> |

Table 2. **Recognition results for 10K synthetic identities.** TAR@FAR=0.1% results obtained by recognition models with various backbones trained using different synthetic datasets for the case of **10K** synthetic identities. The datasets that were generated by FPGAN-control are denoted by FPGC- $w_{app}$  where  $w_{app}$  corresponds to the weight of the appearance loss.

Table 2 present the accuracy results of various recognition models trained on different synthetic datasets, each with 10K synthetic identities. Table 2 supports Table 4 in the main paper, by demonstrating that the superiority of datasets generated by FPGAN-Control compared to the baselines is maintained when using just 10K synthetic identities per dataset.

## References

- [1] Martin Heusel, Hubert Ramsauer, Thomas Unterthiner, Bernhard Nessler, and Sepp Hochreiter. Gans Trained by a Two Time-Scale Update Rule Converge to a Local Nash Equilibrium. In *NIPS*, 2017. 1
